# Supplementary material for: Antibiotic exposure and risk of weight gain and obesity: protocol for a systematic review
Source: PubMed Central journal article supplement (PMC5571496; doi:10.1186/s13643-017-0565-9), 2017-08-24
Supplement: 13643_2017_565_MOESM2_ESM.pdf [file 13643_2017_565_MOESM2_ESM.pdf]

## **Additional File 2 -Search Strategy**

### **Humans Search Strategy:**

Database: Embase Classic+Embase <1947 to 2017 March 02>, Ovid MEDLINE(R) Epub Ahead of Print, In-Process & Other Non-Indexed Citations, Ovid MEDLINE(R) Daily and Ovid MEDLINE(R) <1946 to Present>

Search Strategy:

- 
- 1 exp Anti-Bacterial Agents/ae or \*Anti-Bacterial Agents/ (470783)
  - 2 exp \*Bacterial Infections/dt (219126)
  - 3 (antibiotic\* or anti biotic\* or anti bacterial agent\* or antibacterial agent\* or antibacterial drug\* or anti bacterial drug\*).tw. (671832)
  - 4 (Acedapsone or Alamethicin or Amdinocillin or Amdinocillin Pivoxil or Amikacin or Aminosalicylic Acid or Amoxicillin or Amphotericin B or Ampicillin or Anisomycin or Antimycin A or Arsphenamine or Aurodox or Azithromycin or Azlocillin or Aztreonam or Bacitracin or Bacteriocins or Bambermycins or beta-Lactams or Bongkreic Acid or Brefeldin A or Butirosin Sulfate or Calcimycin or Candicidin or Capreomycin or Carbenicillin or Carfecillin or Cefaclor or Cefadroxil or Cefamandole or Cefatrizine or Cefazolin or cefepime or Cefixime or Cefmenoxime or Cefmetazole or Cefonicid or Cefoperazone or Cefotaxime or Cefotetan or Cefotiam or Cefoxitin or Cefsulodin or Ceftazidime or Ceftizoxime or Ceftriaxone or Cefuroxime or Cephacetrile or Cephalexin or Cephaloglycin or Cephaloridine or Cephalosporins or Cephalothin or Cephamycins or Cephapirin or Cephradine or Chloramphenicol or Chlortetracycline or Ciprofloxacin or Citrinin or Clarithromycin or Clavulanic Acid or Clavulanic Acids or Clindamycin or Clofazimine or Cloxacillin or Colistin or Cyclacillin or Cycloserine or Dactinomycin or Dapsone or Daptomycin or Demeclocycline or Diarylquinolines or Dibekacin or Dicloxacillin or Dihydrostreptomycin Sulfate or Diketopiperazines or Distamycins or Doxycycline or Echinomycin or Edeine or Enoxacin or Enviomycin or Erythromycin or Erythromycin Estolate or Erythromycin Ethylsuccinate or Ethambutol or Ethionamide or Filipin or Floxacillin or Fluoroquinolones or Fosfomycin or Framycetin or Fusidic Acid or Gentamicins or Gramicidin or Hygromycin B or Imipenem or Isoniazid or Josamycin or Kanamycin or Kitasamycin or Lactams or Lasalocid or Leucomycins or Levofloxacin or Lincomycin or Lincosamides or Linezolid or Lucensomycin or Lymecycline or Mepartricin or Methacycline or Methicillin or Mezlocillin or Mikamycin or Minocycline or Miocamycin or Moxalactam or Mupirocin or Mycobacillin or Mycophenolic Acid or Nafcillin or Nalidixic Acid or Natamycin or Nebramycin or Neomycin or Netilmicin or Netropsin or Nigericin or Nisin or Norfloxacin or Novobiocin or Nystatin or Ofloxacin or Oleandomycin or Oligomycins or Oxacillin or Oxolinic Acid or Oxytetracycline or Paromomycin or Pefloxacin or Penicillanic Acid or Penicillic Acid or Penicillin G or Penicillin\* or Pipemidic Acid or Piperacillin or Pivampicillin or Polymyxin B or Polymyxins or Pristinamycin or Prodigiosin or Prothionamide or Pyrazinamide or Ribostamycin or Rifabutin or Rifampin or Rifamycins or Ristocetin or Rolitetracycline or Roxarsone or Roxithromycin or Rutamycin or Sirolimus or Sisomicin or Spectinomycin or Spiramycin or Streptogramin A or Streptogramin Group A or Streptogramin Group B or Streptogramins or Streptomycin or Streptovaricin or Sulbactam or Sulbenicillin or Sulfamerazine or Sulfameter or Sulfamethoxypyridazine or Talampicillin or Teicoplanin or Tetracycline or Thalidomide or Thiamphenicol or Thienamycins or Thioacetazone or Thiostrepton or Ticarcillin or Tobramycin or Trimethoprim, Sulfamethoxazole Drug Combination or Troleandomycin or Tunicamycin or Tylosin or Tyrocidine or Tyrothricin or Valinomycin or Vancomycin or Vernamycin B or Viomycin or Virginiamycin).ti. (430141)

5 or/1-4 (1406680)  
6 Weight Gain/ (121067)  
7 weight gain.tw. (120259)  
8 exp overweight/ (615359)  
9 (obese or obesity or overweight).tw. (602563)  
10 body mass index/ (347666)  
11 (bmi or body mass index).tw. (495141)  
12 Adiposity/ or adiposity.ti. or body fat.ti. (394364)  
13 or/6-12 (1254998)  
14 5 and 13 (13651)  
15 animals/ not humans/ (5515448)  
16 14 not 15 (12593)  
17 limit 16 to english language (11761)  
**18 17 use ppez (2340) Medline**  
19 exp \*antibiotic agent/ae or \*antibiotic agent/ or \*antibiotic therapy/ (141326)  
20 (antibiotic\* or anti biotic\* or anti bacterial agent\* or antibacterial agent\* or antibacterial drug\*  
or anti bacterial drug\*).tw. (671832)  
21 (Acedapsone or Alamethicin or Amdinocillin or Amdinocillin Pivoxil or Amikacin or  
Aminosalicic Acid or Amoxicillin or Amphotericin B or Ampicillin or Anisomycin or Antimycin A or  
Arsphenamine or Aurodox or Azithromycin or Azlocillin or Aztreonam or Bacitracin or Bacteriocins  
or Bambermycins or beta-Lactams or Bongkrekic Acid or Brefeldin A or Butirosin Sulfate or  
Calcimycin or Candicidin or Capreomycin or Carbenicillin or Carfecillin or Cefaclor or Cefadroxil  
or Cefamandole or Cefatrizine or Cefazolin or cefepime or Cefixime or Cefmenoxime or  
Cefmetazole or Cefonicid or Cefoperazone or Cefotaxime or Cefotetan or Cefotiam or Cefoxitin or  
Cefsulodin or Ceftazidime or Ceftizoxime or Ceftriaxone or Cefuroxime or Cephacetrile or  
Cephalexin or Cephaloglycin or Cephaloridine or Cephalosporins or Cephalothin or Cephamycins  
or Cephapirin or Cephradine or Chloramphenicol or Chlortetracycline or Ciprofloxacin or Citrinin  
or Clarithromycin or Clavulanic Acid or Clavulanic Acids or Clindamycin or Clofazimine or  
Cloxacillin or Colistin or Cyclacillin or Cycloserine or Dactinomycin or Dapsone or Daptomycin or  
Demeclocycline or Diarylquinolines or Dibekacin or Dicloxacillin or Dihydrostreptomycin Sulfate or  
Diketopiperazines or Distamycins or Doxycycline or Echinomycin or Edeine or Enoxacin or  
Enviomycin or Erythromycin or Erythromycin Estolate or Erythromycin Ethylsuccinate or  
Ethambutol or Ethionamide or Filipin or Floxacillin or Fluoroquinolones or Fosfomycin or  
Framycetin or Fusidic Acid or Gentamicins or Gramicidin or Hygromycin B or Imipenem or  
Isoniazid or Josamycin or Kanamycin or Kitasamycin or Lactams or Lasalocid or Leucomycins or  
Levofloxacin or Lincomycin or Lincosamides or Linezolid or Lucensomycin or Lymecycline or  
Mepartricin or Methacycline or Methicillin or Mezlocillin or Mikamycin or Minocycline or  
Miocamycin or Moxalactam or Mupirocin or Mycobacillin or Mycophenolic Acid or Nafcillin or  
Nalidixic Acid or Natamycin or Nebramycin or Neomycin or Netilmicin or Netropsin or Nigericin or  
Nisin or Norfloxacin or Novobiocin or Nystatin or Ofloxacin or Oleandomycin or Oligomycins or  
Oxacillin or Oxolinic Acid or Oxytetracycline or Paromomycin or Pefloxacin or Penicillanic Acid or  
Penicillic Acid or Penicillin G or Penicillin\* or Pipemidic Acid or Piperacillin or Pivampicillin or  
Polymyxin B or Polymyxins or Pristinamycin or Prodigiosin or Prothionamide or Pyrazinamide or  
Ribostamycin or Rifabutin or Rifampin or Rifamycins or Ristocetin or Rolitetracycline or  
Roxarsone or Roxithromycin or Rutamycin or Sirolimus or Sisomicin or Spectinomycin or  
Spiramycin or Streptogramin A or Streptogramin Group A or Streptogramin Group B or  
Streptogramins or Streptomycin or Streptovaricin or Sulbactam or Sulbenicillin or Sulfamerazine  
or Sulfameter or Sulfamethoxypridazine or Talampicillin or Teicoplanin or Tetracycline or

Thalidomide or Thiamphenicol or Thienamycins or Thioacetazone or Thioestrepton or Ticarcillin or Tobramycin or Trimethoprim, Sulfamethoxazole Drug Combination or Troleandomycin or Tunicamycin or Tylosin or Tyrocidine or Tyrothricin or Valinomycin or Vancomycin or Vernamycin B or Viomycin or Virginiamycin).ti. (430141)

22 exp \*bacterial infection/dt [Drug Therapy] (219126)

23 or/19-22 (1209101)

24 \*weight gain/ (21201)

25 weight gain.tw. (120259)

26 exp \*obesity/ (347767)

27 (obese or obesity or overweight).tw. (602563)

28 \*body mass/ (28815)

29 (bmi or body mass index).tw. (495141)

30 adiposity.tw. (45069)

31 24 or 25 or 26 or 27 or 28 or 29 or 30 (1064126)

32 23 and 31 (8190)

33 conference abstract.pt. (2476020)

34 32 not 33 (6162)

35 (exp animal/ or nonhuman/) not exp human/ (10546912)

36 34 not 35 (5078)

37 36 use emczd (2843)

**38 limit 37 to english language (2492) Embase**

39 18 or 38 (4832)

**40 remove duplicates from 39 (3067)**

**41 40 use ppez (2271) Medline**

**42 40 use emczd (796) Embase**

### Animals Search Strategy:

Database: Embase Classic+Embase <1947 to 2017 March 02>, Ovid MEDLINE(R) Epub Ahead of Print, In-Process & Other Non-Indexed Citations, Ovid MEDLINE(R) Daily and Ovid MEDLINE(R) <1946 to Present>

Search Strategy:

-----  
1 exp Anti-Bacterial Agents/ae or \*Anti-Bacterial Agents/ (470783)

2 exp \*Bacterial Infections/dt (219126)

3 (antibiotic\* or anti biotic\* or anti bacterial agent\* or antibacterial agent\* or antibacterial drug\* or anti bacterial drug\*).tw. (671832)

4 (Acedapsone or Alamethicin or Amdinocillin or Amdinocillin Pivoxil or Amikacin or Aminosalicylic Acid or Amoxicillin or Amphotericin B or Ampicillin or Anisomycin or Antimycin A or Arsphenamine or Aurodox or Azithromycin or Azlocillin or Aztreonam or Bacitracin or Bacteriocins or Bambermycins or beta-Lactams or Bongkreic Acid or Brefeldin A or Butirosin Sulfate or Calcimycin or Candicidin or Capreomycin or Carbenicillin or Carfecillin or Cefaclor or Cefadroxil or Cefamandole or Cefatrizine or Cefazolin or cefepime or Cefixime or Cefmenoxime or Cefmetazole or Cefonicid or Cefoperazone or Cefotaxime or Cefotetan or Cefotiam or Cefoxitin or Cefsulodin or Ceftazidime or Ceftizoxime or Ceftriaxone or Cefuroxime or Cephacetrile or Cephalixin or Cephaloglycin or Cephaloridine or Cephalosporins or Cephalothin or Cephamycins or Cephapirin or Cephradine or Chloramphenicol or Chlortetracycline or Ciprofloxacin or Citrinin or Clarithromycin or Clavulanic Acid or Clavulanic Acids or Clindamycin or Clofazimine or Cloxacillin or Colistin or Cyclacillin or Cycloserine or Dactinomycin or Dapsone or Daptomycin or

Demeclocycline or Diarylquinolines or Dibekacin or Dicloxacillin or Dihydrostreptomycin Sulfate or Diketopiperazines or Distamycins or Doxycycline or Echinomycin or Edeine or Enoxacin or Enviomycin or Erythromycin or Erythromycin Estolate or Erythromycin Ethylsuccinate or Ethambutol or Ethionamide or Filipin or Floxacillin or Fluoroquinolones or Fosfomycin or Framycetin or Fusidic Acid or Gentamicins or Gramicidin or Hygromycin B or Imipenem or Isoniazid or Josamycin or Kanamycin or Kitasamycin or Lactams or Lasalocid or Leucomycins or Levofloxacin or Lincomycin or Lincosamides or Linezolid or Lucensomycin or Lymecycline or Mepartricin or Methacycline or Methicillin or Mezlocillin or Mikamycin or Minocycline or Miocamycin or Moxalactam or Mupirocin or Mycobacillin or Mycophenolic Acid or Nafcillin or Nalidixic Acid or Natamycin or Nebramycin or Neomycin or Netilmicin or Netropsin or Nigericin or Nisin or Norfloxacin or Novobiocin or Nystatin or Ofloxacin or Oleandomycin or Oligomycins or Oxacillin or Oxolinic Acid or Oxytetracycline or Paromomycin or Pefloxacin or Penicillanic Acid or Penicillic Acid or Penicillin G or Penicillin\* or Pipemidic Acid or Piperacillin or Pivampicillin or Polymyxin B or Polymyxins or Pristinamycin or Prodigiosin or Prothionamide or Pyrazinamide or Ribostamycin or Rifabutin or Rifampin or Rifamycins or Ristocetin or Rolitetracycline or Roxarsone or Roxithromycin or Rutamycin or Sirolimus or Sisomicin or Spectinomycin or Spiramycin or Streptogramin A or Streptogramin Group A or Streptogramin Group B or Streptogramins or Streptomycin or Streptovaricin or Sulbactam or Sulbenicillin or Sulfamerazine or Sulfameter or Sulfamethoxypridazine or Talampicillin or Teicoplanin or Tetracycline or Thalidomide or Thiamphenicol or Thienamycins or Thioacetazone or Thiostrepton or Ticarcillin or Tobramycin or Trimethoprim, Sulfamethoxazole Drug Combination or Troleandomycin or Tunicamycin or Tylosin or Tyrocidine or Tyrothricin or Valinomycin or Vancomycin or Vernamycin B or Viomycin or Virginiamycin).ti. (430141)

5 or/1-4 (1406680)

6 Weight Gain/ (121067)

7 weight gain.tw. (120259)

8 exp overweight/ (615359)

9 (obese or obesity or overweight).tw. (602563)

10 body mass index/ (347666)

11 (bmi or body mass index).tw. (495141)

12 Adiposity/ or adiposity.ti. or body fat.ti. (394364)

13 or/6-12 (1254998)

14 5 and 13 (13651)

15 (animals or animal or mice or mus or mouse or murine or woodmouse or rats or rat or murinae or muridae or cottonrat or cottonrats or hamster or hamsters or cricetinae or rodentia or rodent or rodents or pigs or pig or swine or swines or piglets or piglet or boar or boars or "sus scrofa" or ferrets or ferret or polecat or polecats or "mustela putorius" or "guinea pigs" or "guinea pig" or cavia or callithrix or marmoset or marmosets or cebuella or hapale or octodon or chinchilla or chinchillas or gerbillinae or gerbil or gerbils or jird or jirds or merione or meriones or rabbits or rabbit or hares or hare or diptera or flies or fly or dipteral or drosophila or drosophilidae or cats or cat or carus or felis or nematoda or nematode or nematoda or nematode or nematodes or sipunculida or dogs or dog or canine or canines or canis or sheep or sheeps or mouflon or mouflons or ovis or goats or goat or capra or capras or rupicapra or chamois or haplorhini or monkey or monkeys or anthropoidea or anthropoids or saguinus or tamarin or tamarins or leontopithecus or hominidae or ape or apes or pan or paniscus or "pan paniscus" or bonobo or bonobos or troglodytes or "pan troglodytes" or gibbon or gibbons or siamang or siamangs or nomascus or symphalangus or chimpanzee or chimpanzees or prosimians or "bush baby" or prosimian or bush babies or galagos or galago or pongidae or gorilla or gorillas or pongo or pygmaeus or "pongo pygmaeus" or orangutans or pygmaeus or lemur or lemurs or lemuridae or horse or horses or pongo or equus or cow or calf or bull or chicken or chickens or gallus or quail or bird or birds or quails or poultry or poultries or fowl or fowls or reptile or reptilia or reptiles or snakes or snake or lizard or lizards or alligator or alligators or crocodile or crocodiles or turtle or turtles or amphibian or amphibians or amphibia or frog or frogs or bombina or salientia or toad or toads or "epidalea calamita" or salamander or salamanders or eel or eels or fish or fishes or pisces or catfish or catfishes or siluriformes or arius or heteropneustes or sheatfish or perch or perches or percidae or perca or trout or trouts or char or chars or salvelinus or "fathead minnow"

or minnow or cyprinidae or carps or carp or zebrafish or zebrafishes or goldfish or goldfishes or guppy or guppies or chub or chubs or tinca or barbels or barbus or pimephales or promelas or "poecilia reticulata" or mullet or mullets or seahorse or seahorses or mugil curema or atlantic cod or shark or sharks or catshark or anguilla or salmonid or salmonids or whitefish or whitefishes or salmon or salmons or sole or solea or "sea lamprey" or lamprey or lampreys or pumpkinseed or sunfish or sunfishes or tilapia or tilapias or turbot or turbots or flatfish or flatfishes or sciuridae or squirrel or squirrels or chipmunk or chipmunks or suslik or susliks or vole or voles or lemming or lemmings or muskrat or muskrats or lemmus or otter or otters or marten or martens or martes or weasel or badger or badgers or ermine or mink or minks or sable or sables or gulo or gulos or wolverine or wolverines or minks or mustela or llama or llamas or alpaca or alpacas or camelid or camelids or guanaco or guanacos or chiroptera or chiropteras or bat or bats or fox or foxes or iguana or iguanas or xenopus laevis or parakeet or parakeets or parrot or parrots or donkey or donkeys or mule or mules or zebra or zebras or shrew or shrews or bison or bisons or buffalo or buffaloes or deer or deers or bear or bears or panda or pandas or "wild hog" or "wild boar" or fitchew or fitch or beaver or beavers or jerboa or jerboas or capybara or capybaras).tw. (9643295)  
16 exp "animal experimentation"/ or exp "models, animal"/ or exp "invertebrates"/ or "Animals"/ or exp "animal population groups"/ or "chordata"/ or exp "chordata, nonvertebrate"/ or "vertebrates"/ or exp "amphibians"/ or exp "birds"/ or exp "fishes"/ or exp "reptiles"/ or "mammals"/ or "primates"/ or exp "artiodactyla"/ or exp "carnivora"/ or exp "cetacea"/ or exp "chiroptera"/ or exp "elephants"/ or exp "hyraxes"/ or exp "insectivora"/ or exp "lagomorpha"/ or exp "marsupialia"/ or exp "monotremata"/ or exp "perissodactyla"/ or exp "rodentia"/ or exp "scandentia"/ or exp "sirenia"/ or exp "xenarthra"/ or "haplorhini"/ or exp "strepsirhini"/ or exp "platyrrhini"/ or exp "tarsii"/ or "catarrhini"/ or exp "cercopithecidae"/ or exp "hylobatidae"/ or "hominidae"/ or exp "gorilla gorilla"/ or exp "pan paniscus"/ or exp "pan troglodytes"/ or exp "pongo pygmaeus"/ (29923159)

17 15 or 16 (30973478)

18 14 and 17 (10832)

19 18 use ppez (1006)

**20 limit 19 to english language (925) Medline**

21 exp \*antibiotic agent/ae or \*antibiotic agent/ or \*antibiotic therapy/ (141326)

22 (antibiotic\* or anti biotic\* or anti bacterial agent\* or antibacterial agent\* or antibacterial drug\* or anti bacterial drug\*).tw. (671832)

23 (Acedapsone or Alamethicin or Amdinocillin or Amdinocillin Pivoxil or Amikacin or Aminosalicylic Acid or Amoxicillin or Amphotericin B or Ampicillin or Anisomycin or Antimycin A or Arsphenamine or Aurodox or Azithromycin or Azlocillin or Aztreonam or Bacitracin or Bacteriocins or Bambermycins or beta-Lactams or Bongkreic Acid or Brefeldin A or Butirosin Sulfate or Calcimycin or Candicidin or Capreomycin or Carbenicillin or Carfecillin or Cefaclor or Cefadroxil or Cefamandole or Cefatrizine or Cefazolin or cefepime or Cefixime or Cefmenoxime or Cefmetazole or Cefonicid or Cefoperazone or Cefotaxime or Cefotetan or Cefotiam or Cefoxitin or Cefsulodin or Ceftazidime or Ceftizoxime or Ceftriaxone or Cefuroxime or Cephacetrile or Cephalalexin or Cephaloglycin or Cephaloridine or Cephalosporins or Cephalothin or Cephamycins or Cephapirin or Cephradine or Chloramphenicol or Chlortetracycline or Ciprofloxacin or Citrinin or Clarithromycin or Clavulanic Acid or Clavulanic Acids or Clindamycin or Clofazimine or Cloxacillin or Colistin or Cyclacillin or Cycloserine or Dactinomycin or Dapsone or Daptomycin or Demeclocycline or Diarylquinolines or Dibekacin or Dicloxacillin or Dihydrostreptomycin Sulfate or Diketopiperazines or Distamycins or Doxycycline or Echinomycin or Edeine or Enoxacin or Enviomycin or Erythromycin or Erythromycin Estolate or Erythromycin Ethylsuccinate or Ethambutol or Ethionamide or Filipin or Floxacillin or Fluoroquinolones or Fosfomycin or Framycetin or Fusidic Acid or Gentamicins or Gramicidin or Hygromycin B or Imipenem or Isoniazid or Josamycin or Kanamycin or Kitasamycin or Lactams or Lasalocid or Leucomycins or Levofloxacin or Lincomycin or Lincosamides or Linezolid or Lucensomycin or Lymecycline or Mepartricin or Methacycline or Methicillin or Mezlocillin or Mikamycin or Minocycline or Miocamycin or Moxalactam or Mupirocin or Mycobacillin or Mycophenolic Acid or Nafcillin or Nalidixic Acid or Natamycin or Nebramycin or Neomycin or Netilmicin or Netropsin or Nigericin or Nisin or Norfloxacin or Novobiocin or Nystatin or Ofloxacin or Oleandomycin or Oligomycins or

Oxacillin or Oxolinic Acid or Oxytetracycline or Paromomycin or Pefloxacin or Penicillanic Acid or Penicillic Acid or Penicillin G or Penicillin\* or Pipemidic Acid or Piperacillin or Pivampicillin or Polymyxin B or Polymyxins or Pristinamycin or Prodigiosin or Prothionamide or Pyrazinamide or Ribostamycin or Rifabutin or Rifampin or Rifamycins or Ristocetin or Rolitetraacycline or Roxarsone or Roxithromycin or Rutamycin or Sirolimus or Sisomicin or Spectinomycin or Spiramycin or Streptogramin A or Streptogramin Group A or Streptogramin Group B or Streptogramins or Streptomycin or Streptovaricin or Sulbactam or Sulbenicillin or Sulfamerazine or Sulfameter or Sulfamethoxypyridazine or Talampicillin or Teicoplanin or Tetracycline or Thalidomide or Thiamphenicol or Thienamycins or Thioacetazone or Thiostrepton or Ticarcillin or Tobramycin or Trimethoprim, Sulfamethoxazole Drug Combination or Troleandomycin or Tunicamycin or Tylosin or Tyrocidine or Tyrothricin or Valinomycin or Vancomycin or Vernamycin B or Viomycin or Virginiamycin).ti. (430141)

24 exp \*bacterial infection/dt [Drug Therapy] (219126)

25 or/21-24 (1209101)

26 \*weight gain/ (21201)

27 weight gain.tw. (120259)

28 exp \*obesity/ (347767)

29 (obese or obesity or overweight).tw. (602563)

30 \*body mass/ (28815)

31 (bmi or body mass index).tw. (495141)

32 adiposity.tw. (45069)

33 26 or 27 or 28 or 29 or 30 or 31 or 32 (1064126)

34 25 and 33 (8190)

35 conference abstract.pt. (2476020)

36 34 not 35 (6162)

37 (animal or animals or pisces or fish or fishes or catfish or catfishes or sheatfish or silurus or arius or heteropneustes or clarias or gariepinus or fathead minnow or fathead minnows or pimephales or promelas or cichlidae or trout or trouts or char or chars or salvelinus or salmo or oncorhynchus or guppy or guppies or millionfish or poecilia or goldfish or goldfishes or carassius or auratus or mullet or mullets or mugil or curema or shark or sharks or cod or cods or gadus or morhua or carp or carps or cyprinus or carpio or killifish or eel or eels or anguilla or zander or sander or lucioperca or stizostedion or turbot or turbots or psetta or flatfish or flatfishes or plaice or pleuronectes or platessa or tilapia or tilapias or oreochromis or sarotherodon or common sole or dover sole or solea or zebrafish or zebrafishes or danio or rerio or seabass or dicentrarchus or labrax or morone or lamprey or lampreys or petromyzon or pumpkinseed or pumpkinseeds or lepomis or gibbosus or herring or clupea or harengus or amphibia or amphibian or amphibians or anura or salientia or frog or frogs or rana or toad or toads or bufo or xenopus or laevis or bombina or epidalea or calamita or salamander or salamanders or newt or newts or triturus or reptilia or reptile or reptiles or bearded dragon or pogona or vitticeps or iguana or iguanas or lizard or lizards or anguis fragilis or turtle or turtles or snakes or snake or aves or bird or birds or quail or quails or coturnix or bobwhite or colinus or virginianus or poultry or poultries or fowl or fowls or chicken or chickens or gallus or zebra finch or taeniopygia or guttata or canary or canaries or serinus or canaria or parakeet or parakeets or grasskeet or parrot or parrots or psittacine or psittacines or shelduck or tadorna or goose or geese or branta or leucopsis or woodlark or lullula or flycatcher or ficedula or hypoleuca or dove or doves or geopelia or cuneata or duck or ducks or greylag or graylag or anser or harrier or circus pygargus or red knot or great knot or calidris or canutus or godwit or limosa or lapponica or meleagris or gallopavo or jackdaw or corvus or monedula or ruff or philomachus or pugnax or lapwing or peewit or plover or vanellus or swan or cygnus or columbianus or bewickii or gull or chroicocephalus or ridibundus or albifrons or great tit or parus or aythya or fuligula or streptopelia or risoria or spoonbill or platalea or leucorodia or blackbird or turdus or merula or blue tit or cyanistes or pigeon or pigeons or columba or pintail or anas or starling or sturnus or owl or athene noctua or pochard or ferina or cockatiel or nymphicus or hollandicus or skylark or alauda or tern or sterna or teal or crecca or oystercatcher or haematopus or ostralegus or shrew or shrews or sorex or araneus or crocidura or russula or european mole or talpa or chiroptera or bat or bats or eptesicus or serotinus or myotis or dasycneme or daubentonii or pipistrelle or pipistrellus or cat or cats or felis or catus or feline or

dog or dogs or canis or canine or canines or otter or otters or lutra or badger or badgers or meles or fitchew or fitch or foumart or foulmart or ferrets or ferret or polecat or polecats or mustela or putorius or weasel or weasels or fox or foxes or vulpes or common seal or phoca or vitulina or grey seal or halichoerus or horse or horses or equus or equine or equidae or donkey or donkeys or mule or mules or pig or pigs or swine or swines or hog or hogs or boar or boars or porcine or piglet or piglets or sus or scrofa or llama or llamas or lama or glama or deer or deers or cervus or elaphus or cow or cows or bos taurus or bos indicus or bovine or bull or bulls or cattle or bison or bisons or sheep or sheeps or ovis aries or ovine or lamb or lambs or mouflon or mouflons or goat or goats or capra or caprine or chamois or rupicapra or leporidae or lagomorpha or lagomorph or rabbit or rabbits or oryctolagus or cuniculus or laprine or hares or lepus or rodentia or rodent or rodents or murinae or mouse or mice or mus or musculus or murine or woodmouse or apodemus or rat or rats or rattus or norvegicus or guinea pig or guinea pigs or cavia or porcellus or hamster or hamsters or mesocricetus or cricetus or cricetus or gerbil or gerbils or jird or jirds or meriones or unguiculatus or jerboa or jerboas or jaculus or chinchilla or chinchillas or beaver or beavers or castor fiber or castor canadensis or sciuridae or squirrel or squirrels or sciurus or chipmunk or chipmunks or marmot or marmots or marmota or suslik or susliks or spermophilus or cynomys or cottonrat or cottonrats or sigmodon or vole or voles or microtus or myodes or glareolus or primate or primates or prosimian or prosimians or lemur or lemurs or lemuridae or loris or bush baby or bush babies or bushbaby or bushbabies or galago or galagos or anthropoidea or anthropoids or simian or simians or monkey or monkeys or marmoset or marmosets or callithrix or cebuella or tamarin or tamarins or saguinus or leontopithecus or squirrel monkey or squirrel monkeys or saimiri or night monkey or night monkeys or owl monkey or owl monkeys or douroucoulis or aotus or spider monkey or spider monkeys or ateles or baboon or baboons or papio or rhesus monkey or macaque or macaca or mulatta or cynomolgus or fascicularis or green monkey or green monkeys or chlorocebus or vervet or vervets or pygerythrus or hominoidea or ape or apes or hylobatidae or gibbon or gibbons or siamang or siamangs or nomascus or symphalangus or hominidae or orangutan or orangutans or pongo or chimpanzee or chimpanzees or pan troglodytes or bonobo or bonobos or pan paniscus or gorilla or gorillas or troglodytes).ti,ab.  
(9919753)

38 \*animal experiment/ or \*animal model/ or \*animal/ or exp \*experimental animal/ (143311)

39 37 or 38 (9926343)

40 36 and 39 (1371)

**41 40 use emczd (733)**

**42 limit 41 to english language (638) Embase**

43 20 or 42 (1563)

**44 remove duplicates from 43 (1085)**

**45 44 use ppez (904) Medline**

**46 43 use emczd (638) Embase**
